# Supplementary material for: Crystal structure of a homotrimeric verrucomicrobial exo-β-1,4-mannosidase active in the hindgut of the wood-feeding termite Reticulitermes flavipes
Source: PubMed Central journal article supplement (PMC8233224; doi:10.1016/j.yjsbx.2021.100048), 2021-05-24
Supplement: mmc1.pdf [file mmc1.pdf]

## Appendix A. Supplementary data

### Crystal structure of a homotrimeric verrucomicrobial exo- $\beta$ -1,4-mannosidase active in the hindgut of the wood-feeding termite *Reticulitermes flavipes*

Dayanand C. Kalyani<sup>1#</sup>, Tom Reichenbach<sup>1#</sup>, Markus M. Keskitalo<sup>1</sup>, Julian Conrad<sup>2,3</sup>, Henrik Aspeborg<sup>1</sup>, Christina Divne<sup>1</sup>

**1 - School of Engineering Sciences in Chemistry, Biotechnology, and Health (CBH), KTH Royal Institute of Technology, Roslagstullsbacken 21, SE-11421 Stockholm, Sweden.**

**2 - Department of Biochemistry and Biophysics, Stockholm University, Svante Arrhenius väg 16C, SE-10691 Stockholm, Sweden.**

**3 - Science for Life Laboratory, Stockholm University, Tomtebodavägen 23, SE-17165 Solna, Sweden.**

# These authors contributed equally to this work.

**Correspondence to Christina Divne:** [divne@kth.se](mailto:divne@kth.se)

**Figure S1**

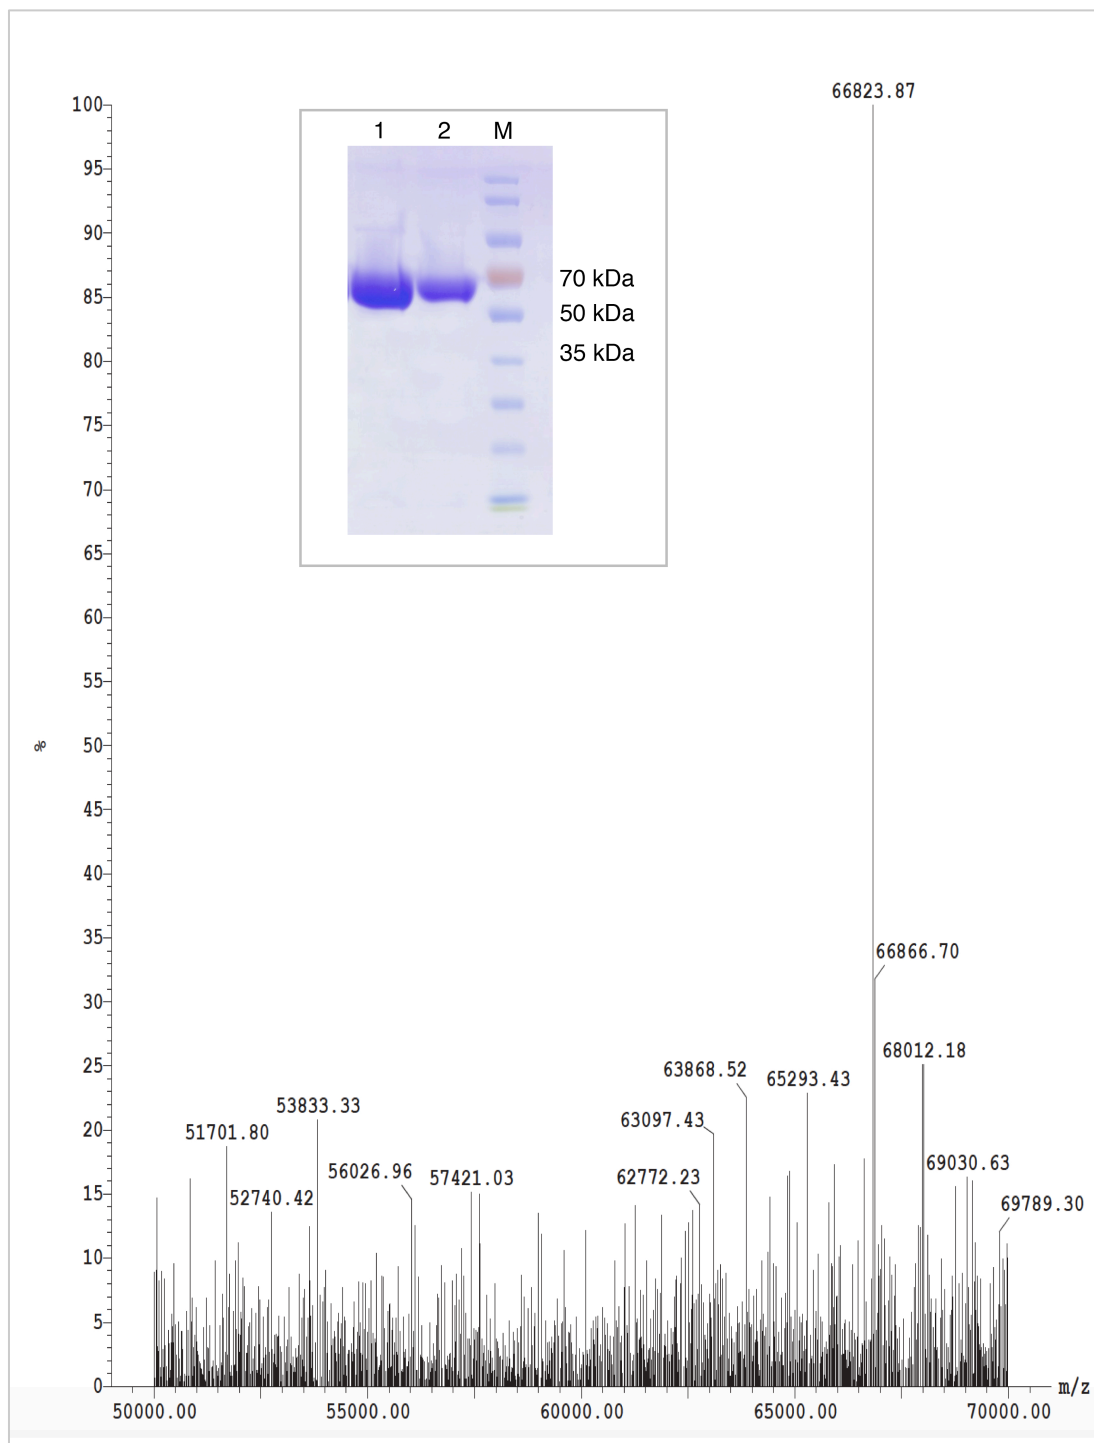

**Figure S1. Molecular mass of *Op5Man5*.** Liquid chromatography-tandem mass spectrometry (LC-MS/MS) of recombinant *Op5Man5* gives a molecular mass of 66,824 g/mol. The inset panel shows an SDS-PAGE gel of purified *Op5Man5* with different amounts of protein loaded in the two lanes. M, molecular weight reference proteins.

Figure S2

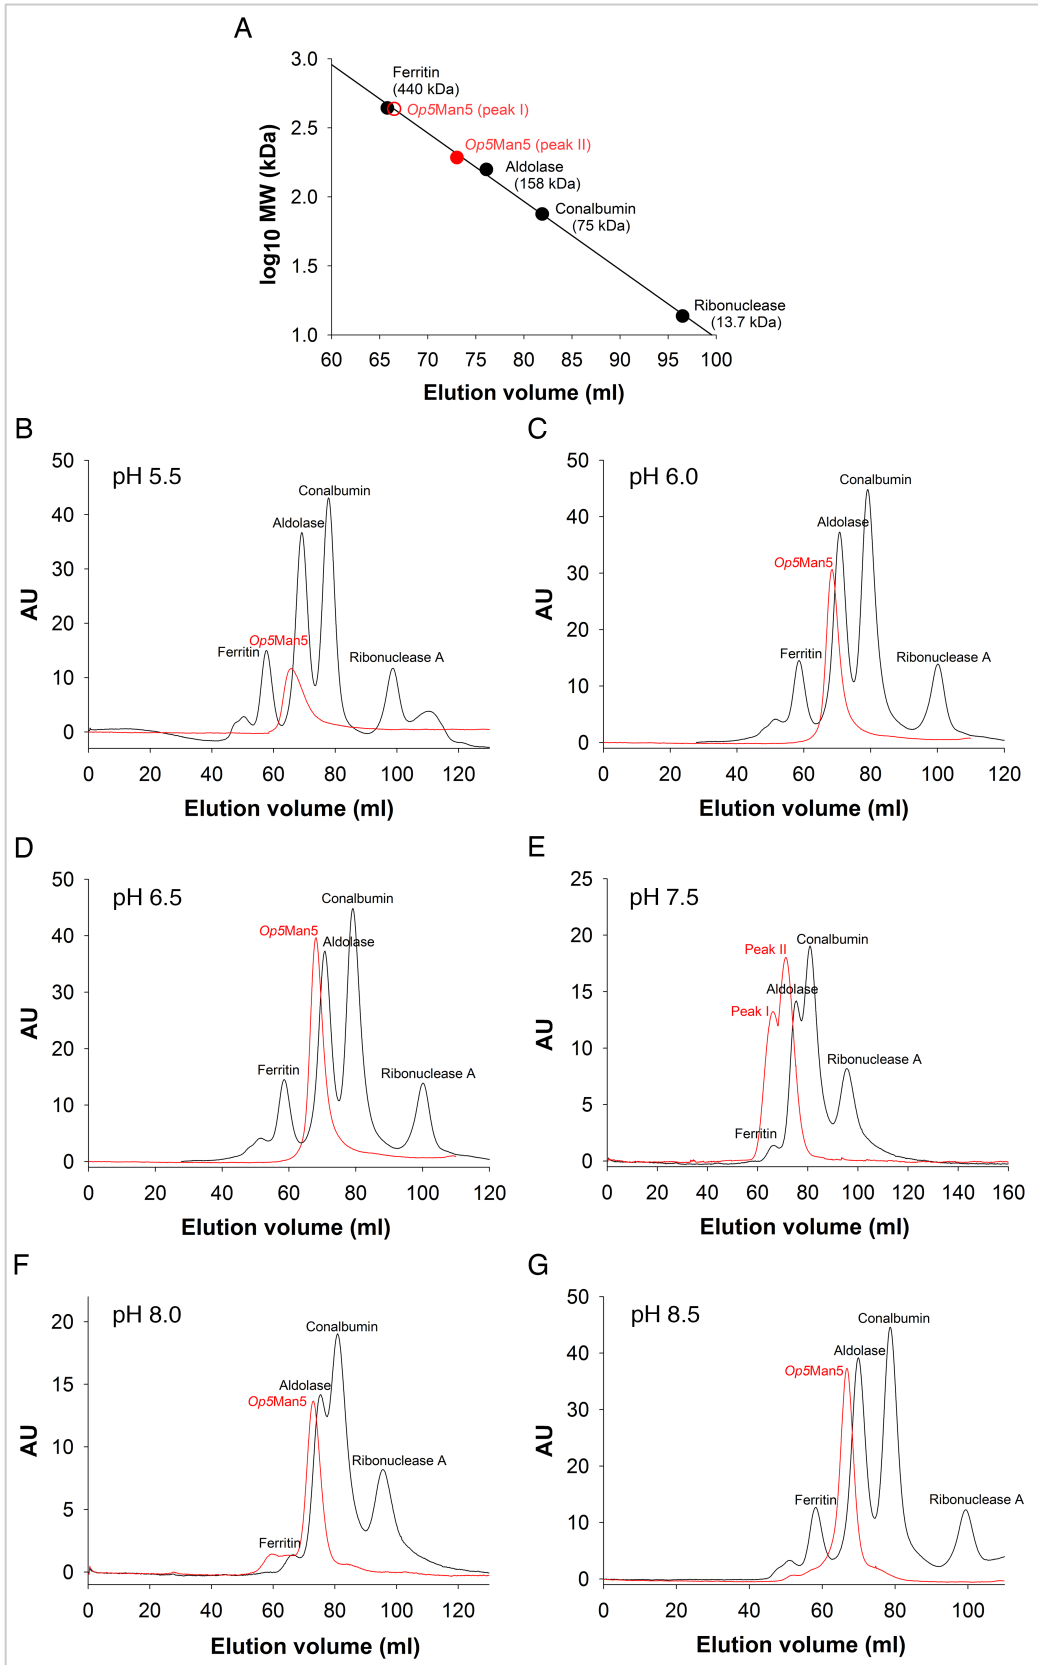

**Figure S2. SEC analysis of *Op5Man5*.** (A) Standard curve at pH 7.5 ( $R^2 = 0.9954$ ) based on the reference proteins (black filled circles), and the extrapolated molecular weights of the *Op5Man5* hexamer (peak I; ~434 kDa; red open circle) and trimer (peak II; ~214 kDa; red filled circle). SEC profiles of *Op5Man5* at different pH values (red curve) overlaid with the profiles of the reference proteins: (B) pH 5.5; (C) pH 6.0; (D) pH 6.5; (E) pH 7.5; (F) pH 8.0; and (G) pH 8.5. The SEC profile in (E) shows two distinct species: peak I (hexamer) and peak II (trimer).

**Figure S3**

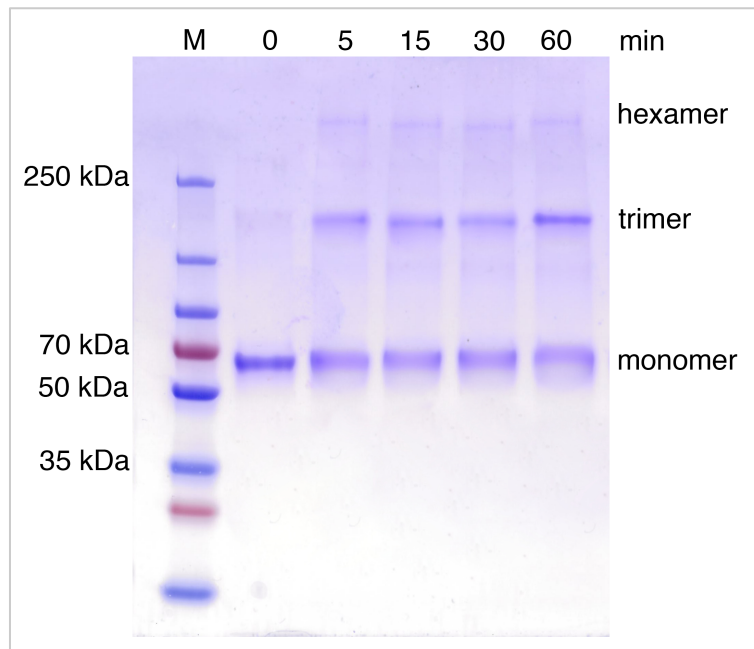

**Figure S3. Chemical cross-linking of *Op5Man5*.** Results of the crosslinking reaction as a function of time as represented by a Coomassie-stained SDS-PAGE. At  $t = 0$ , only the monomer band is present.

**Figure S4**

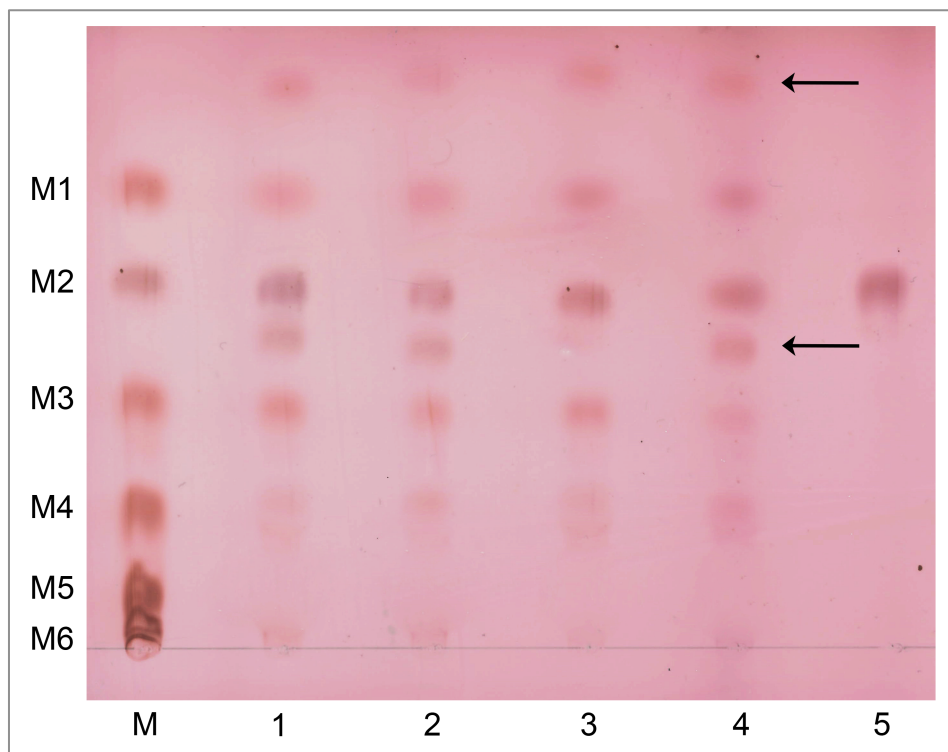

**Figure S4. Transglycosylation products.** TLC analysis of products from incubating M2 with methanol (lane 1), ethanol (lane 2), 1-propanol (lane 3), and hexanol (lane 4). Reference mannooligosaccharides: M1-M6 (lane M), and M2 (lane 5). Alkyl  $\beta$ -mannosides are indicated by arrows.

**Figure S5**

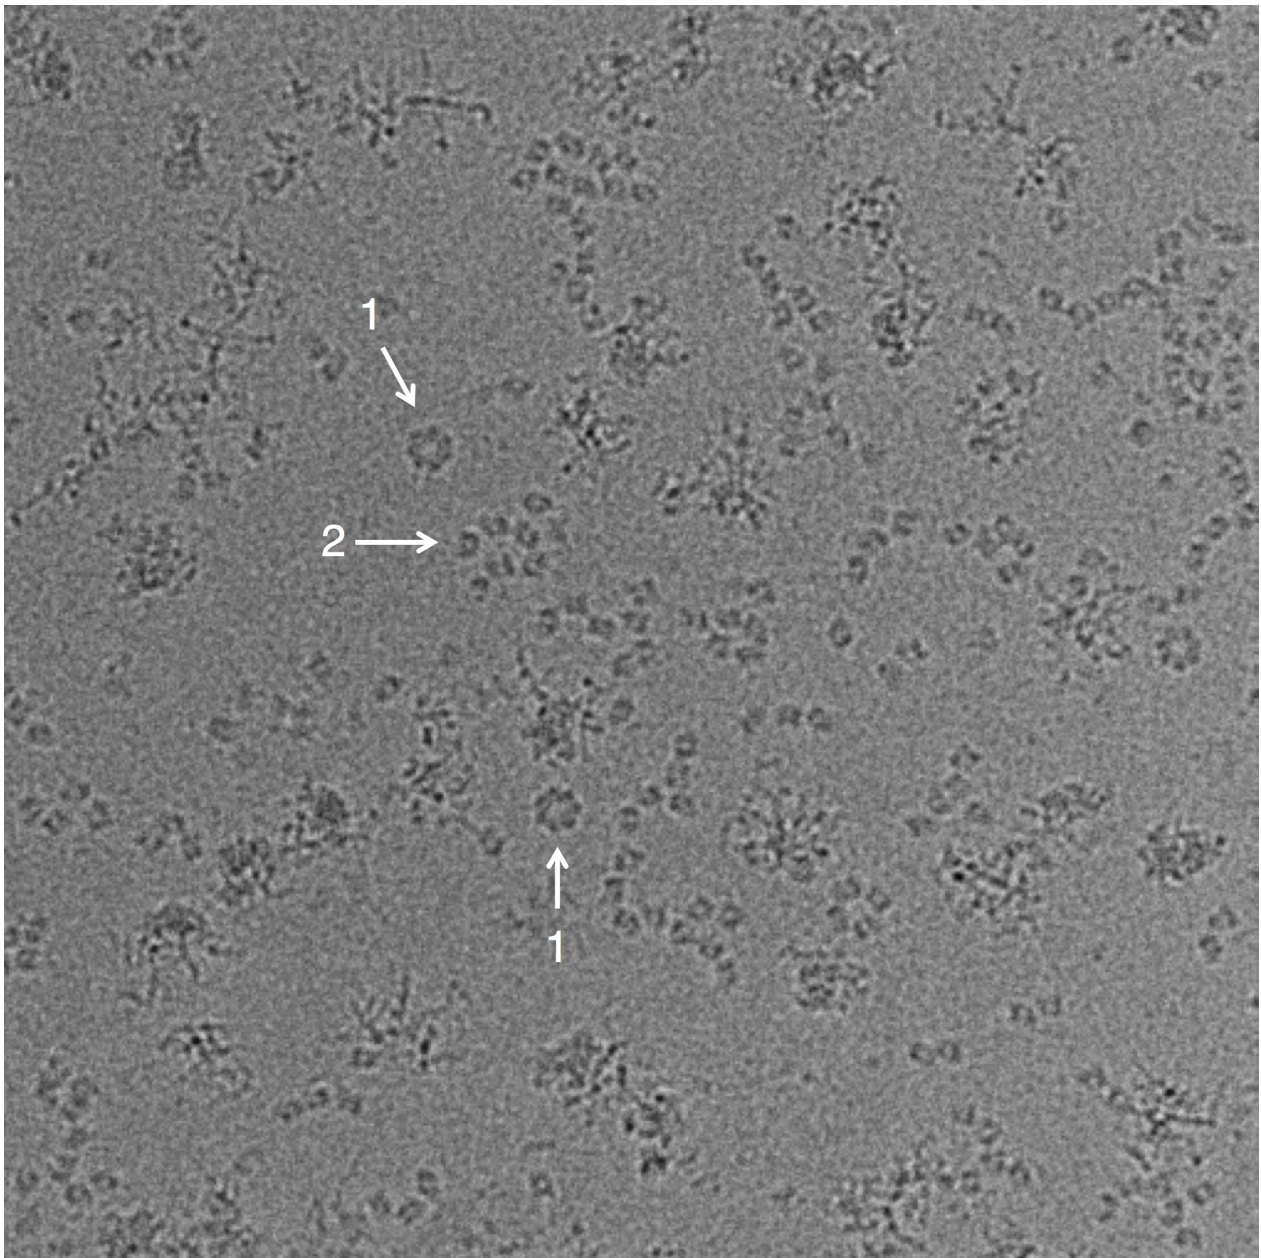

**Figure S5. Oligomeric species.** Electron micrograph showing two distinct species of *Op5GH5*, a hexameric or heptameric assembly (1) and the trimeric species (2).

Figure S6

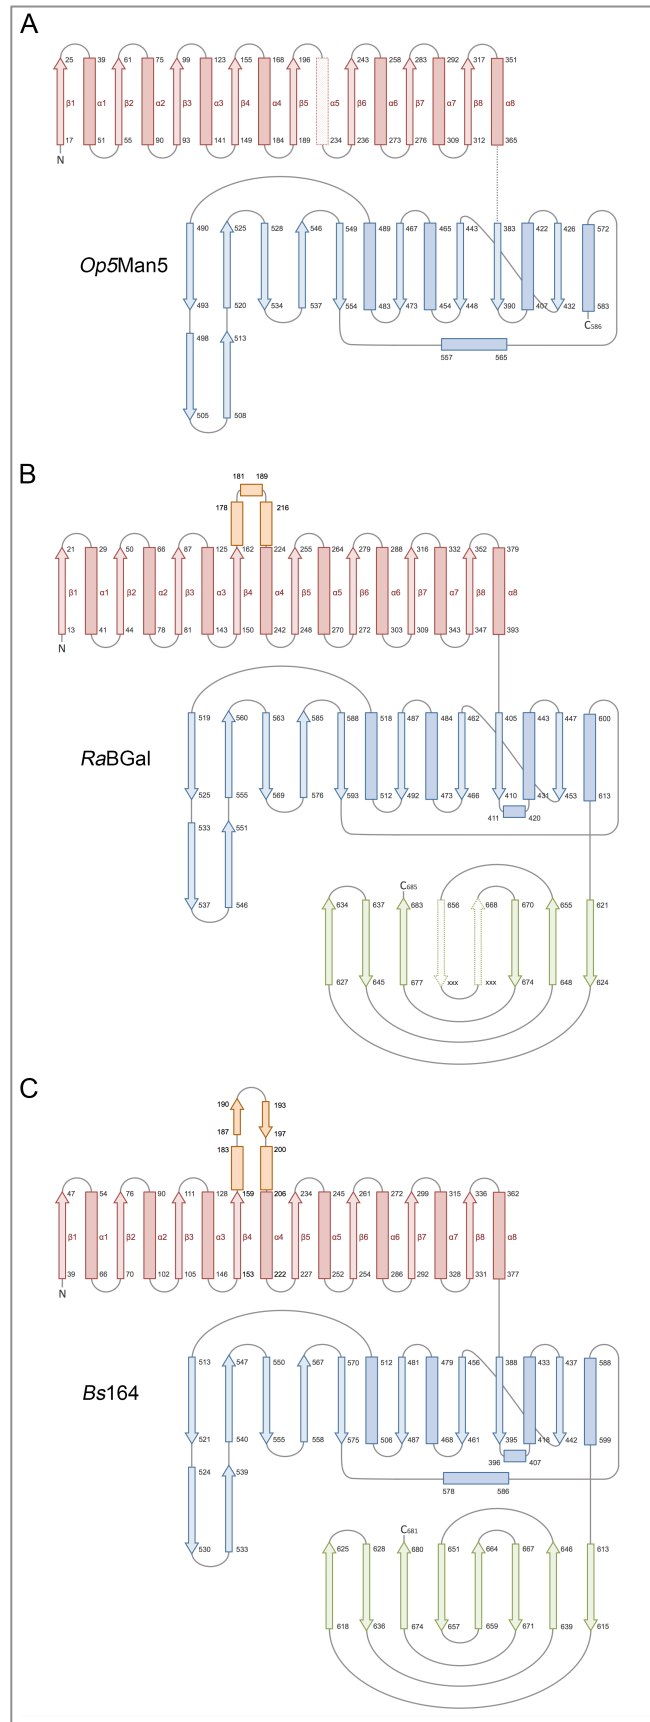



**Figure S6. Topological similarity of *Op5Man5*, *RaBGal* and *Bs164*.** The N-terminal folds as a TIM barrel (domain A; red), and continues into a Rossmann-like mixed-sheet domain (domain B; blue). Except for a helical extension (orange) in the A-domain of *RaBGal* and *Bs164*, and an additional peripheral  $\alpha$ -helix in the B domain of *Op5Man5*, the topology of the A and B domains are identical in the three enzymes. The C-terminal domain (domain C; green) in *RaBGal* and *Bs164* features a Greek-key fold that is not present in *Op5Man5*. Two  $\beta$ -strands in the Greek-key domain of *RaBGal* are partly disordered, which is indicated as dashed arrows. The unmodeled region in *Op5Man5* comprising residues 210-221 is shown as a dashed, unfilled rectangle indicating a possible  $\alpha$ -helix that is either very flexible or partly unfolded. A second unmodeled region is the linker peptide between domains A and B in *Op5Man5* (residues 366-382). Note that the deposited *Bs164* models have a sequence offset of +10 residues relative the sequence deposited in UniProt (entry I9SUA3), and the numbering used in the topology diagram is that of the models.

**Figure S7**

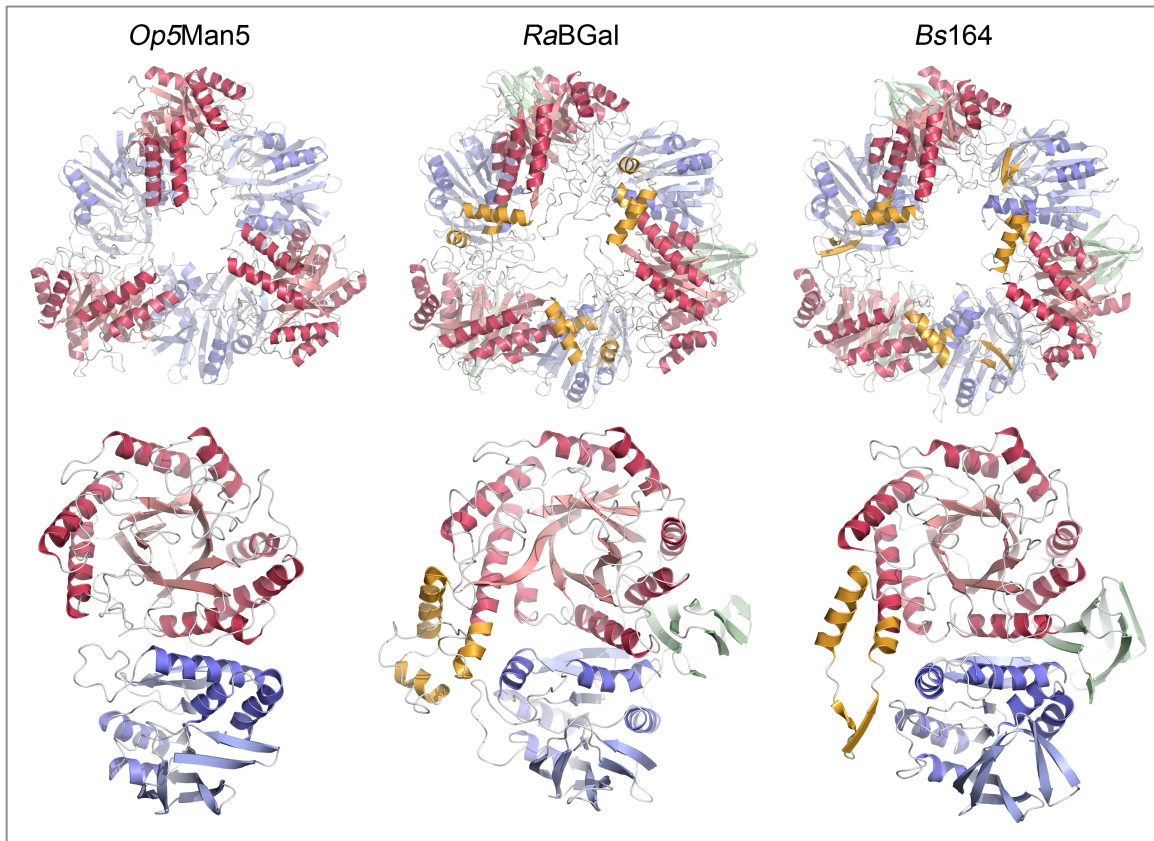

**Figure S7. Structural comparison of *Op5Man5*, *RaBGal* and *Bs164*.** Overview of the trimer and monomer structure of *Op5Man5* (this work), *RaBGal* (PDB code 5E9A) and *Bs164* (PDB code 6T75). The same colors are used as in Fig. S5.

Figure S8

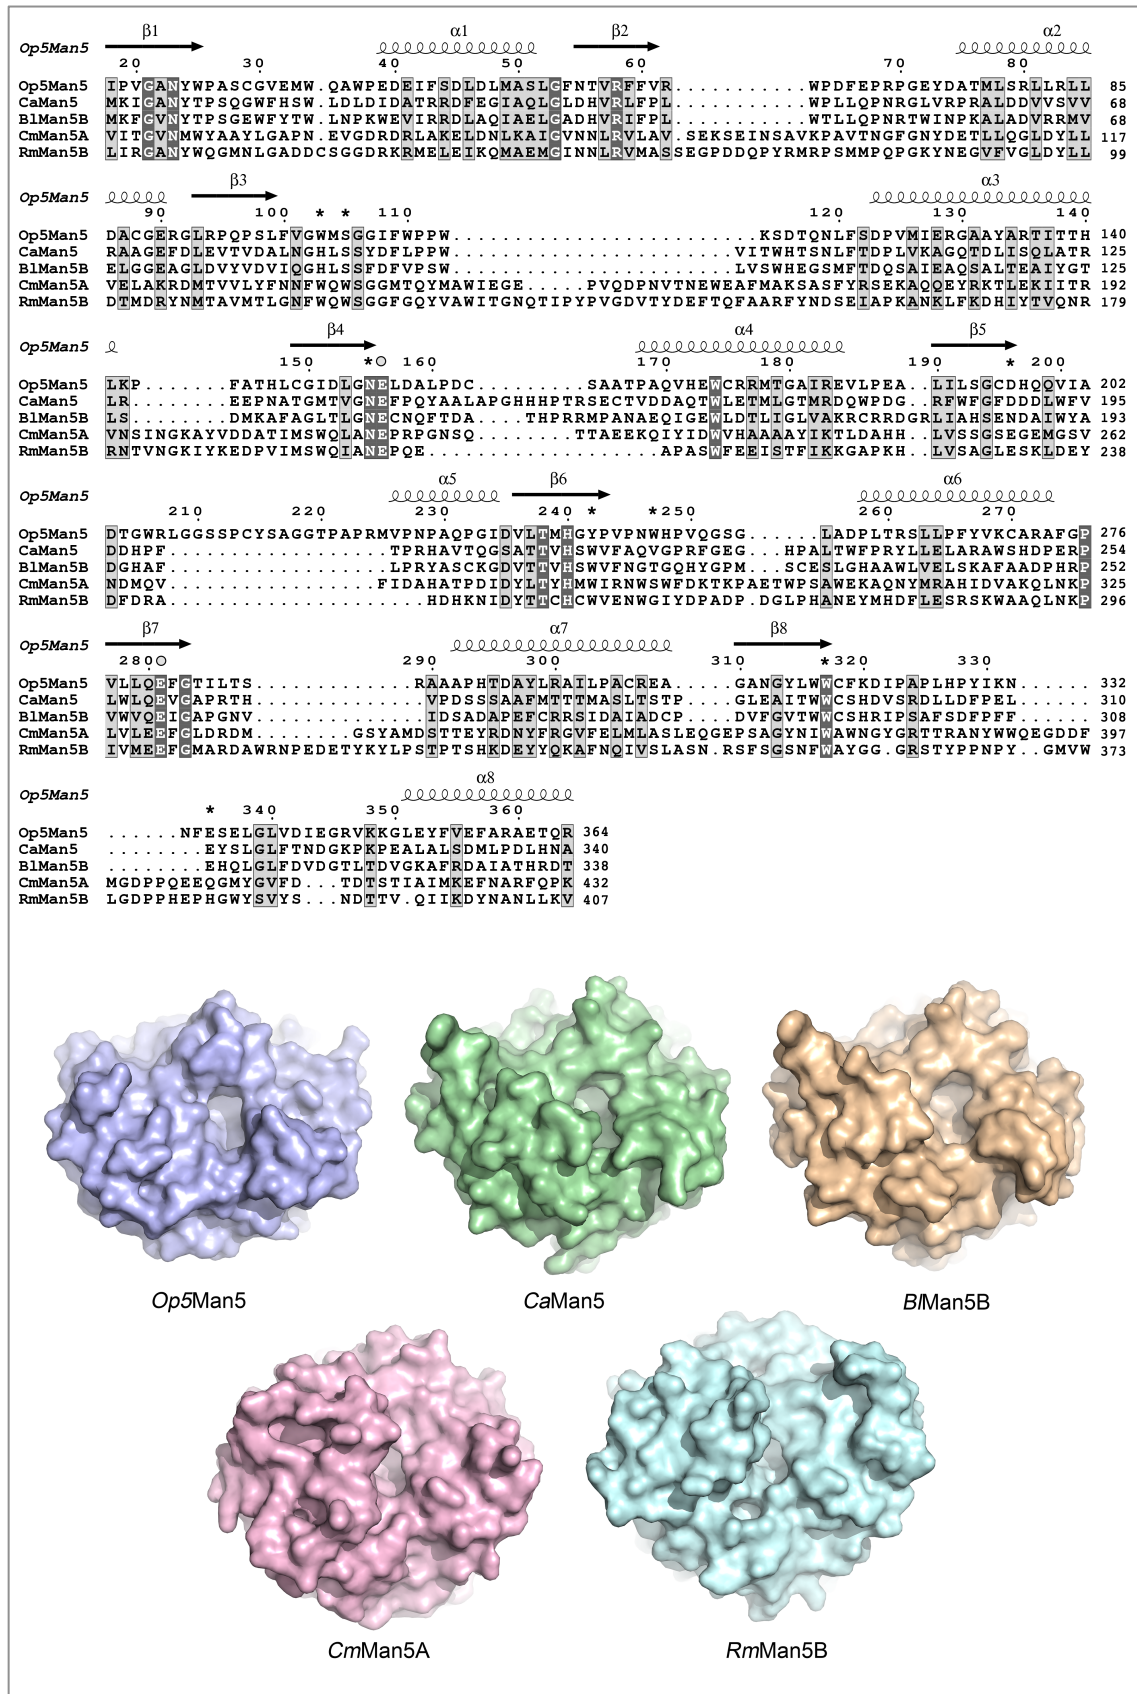

**Figure S8. Comparison of the catalytic TIM-barrel domains of GH5  $\alpha$ -1,4-mannosidases.** (A) Structure-based sequence alignment of the catalytic TIM-barrel domains of *Op5Man5*, *CaMan5* (PDB 6GVB<sup>31</sup>), *B/Man5B* (PDB 6MPA<sup>47</sup>), *CmMan5A* (PDB 1UUQ<sup>20</sup>) and *RmMan5B* (PDB 4LYP<sup>17</sup>). Surface representations of the TIM-barrel domains are shown to highlight the differences in shape of the entrance to the binding pockets.



Figure S10

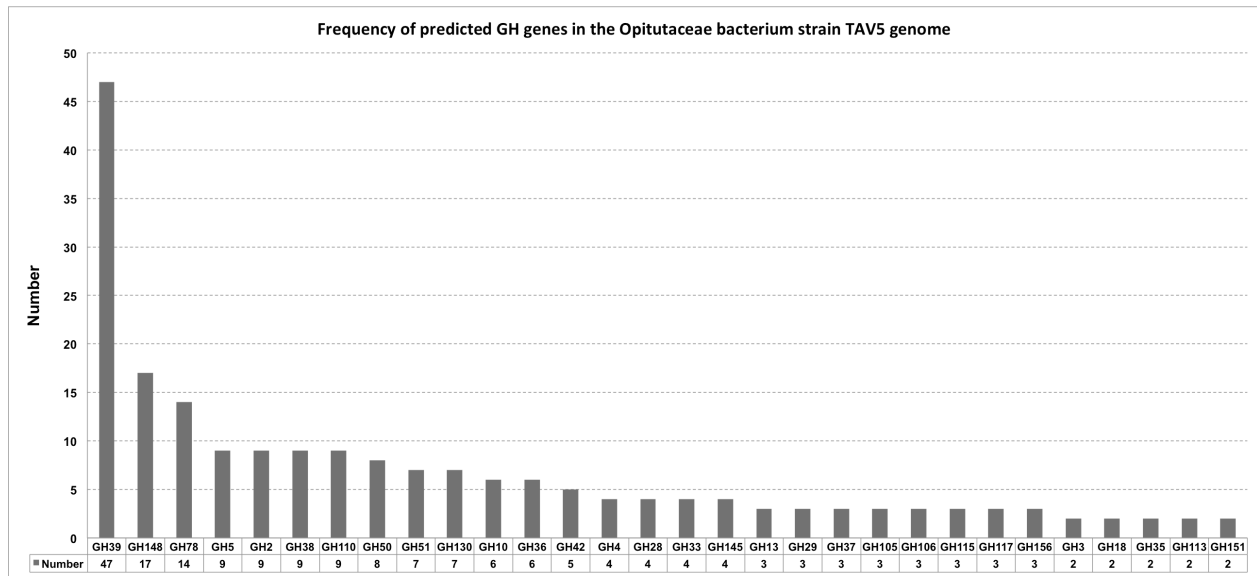

Figure S10. GH genes in the *Opitutaceae* bacterium strain TAV5 genome. The distribution of GH genes in the genome of *Opitutaceae* bacterium strain TAV5 according to GH family.

**Figure S11**

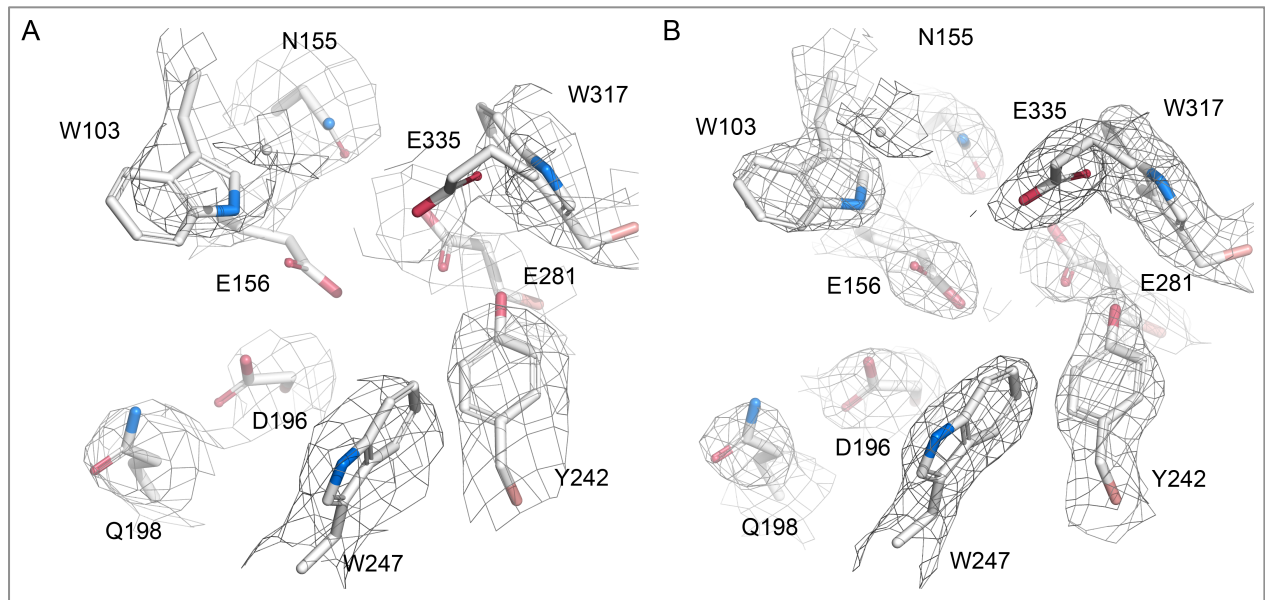

**Figure S11. Quality of the cryo-EM and final X-ray map.** Comparison of the map quality in the region of the active site. The 3.7 Å cryo-EM map (A) is of good overall quality, especially for aromatic residues, but lacks detectable signal for some side chains (E156, D196, E335), for which the 2.2 Å  $2F_o - F_c$  electron-density map (B) provided additional information.

**Table S1. Reported activity on pNP-βMan for a selection of retaining glycoside hydrolases with exo-β-1,4-mannosidase activity (EC 3.2.1.25).**

| Enzyme name                   | Gene name         | Organism name                                                                    | UniProt accession | CAZy subfamily | <sup>a</sup> Molecular weight (g mol <sup>-1</sup> ) | PDB accession | Oligomeric state     | <sup>b</sup> K <sub>m</sub> (mM) | <sup>c</sup> k <sub>cat</sub> (s <sup>-1</sup> ) | <sup>d</sup> k <sub>cat</sub> /K <sub>m</sub> (s <sup>-1</sup> mM <sup>-1</sup> ) | Specific activity U mg <sup>-1</sup> | Transglycosylation activity | Reference                      | Digital object identifier            |  |
|-------------------------------|-------------------|----------------------------------------------------------------------------------|-------------------|----------------|------------------------------------------------------|---------------|----------------------|----------------------------------|--------------------------------------------------|-----------------------------------------------------------------------------------|--------------------------------------|-----------------------------|--------------------------------|--------------------------------------|--|
| <b>GH5 (Bacteria)</b>         |                   |                                                                                  |                   |                |                                                      |               |                      |                                  |                                                  |                                                                                   |                                      |                             |                                |                                      |  |
| Op5Man5                       | OPIT5_10225       | <i>Opiritaceae</i> bacterium strain TAV5, Verrucomicrobia                        | W0J1H8            | –              | 66,062                                               | This work     | homotrimer / hexamer | 1.0                              | 238.9                                            | 238.9                                                                             | –                                    | Yes                         | This work                      |                                      |  |
| TthMan5                       | Theth_0949        | <i>Pseudothermotoga (Thermotoga) thermarum</i> strain DSM 5069, Thermotogae      | F7YX66            | 19             | 70,687                                               | n.a.          | oligomer             | 4.4                              | 1924                                             | 441                                                                               | –                                    | n.a.                        | Shi <i>et al.</i> 2013         | 10.1186/1472-6750-13-83              |  |
| CaMan5_18                     | PAZ_c15370        | <i>Cutibacterium acnes (Propionibacterium acnes)</i> , Actinobacteria            | A0A2B717A6        | 18             | 45,701                                               | 6GVB          | homodimer            | 10.4                             | 7.8                                              | 0.75                                                                              | –                                    | n.a.                        | Reichenbach <i>et al.</i> 2018 | 10.1371/journal.pone.0204703         |  |
| BtMan5B                       | BLD_0195 (BL1333) | <i>Bifidobacterium longum</i> strain DJO10A, Actinobacteria                      | B3DQP5            | 18             | 47,441                                               | 6MPA          | homodimer            | <sup>d</sup> n.a.                | <sup>d</sup> n.a.                                | <sup>d</sup> n.a.                                                                 | –                                    | n.a.                        | Cordeiro <i>et al.</i> 2019    | 10.1016/j.jmb.2018.12.017            |  |
| CmMan5A                       | man5A             | <i>Cellvibrio mixtus</i> strain NCIMB 8633, Proteobacteria                       | Q6QT42            | 7              | 51,623                                               | 1UUU          | monomer              | 1.6                              | 0.033                                            | 0.021                                                                             | –                                    | Yes                         | Dias <i>et al.</i> 2004        | 10.1074/jbc.M401647200               |  |
| <b>GH5 (Eukaryota, Fungi)</b> |                   |                                                                                  |                   |                |                                                      |               |                      |                                  |                                                  |                                                                                   |                                      |                             |                                |                                      |  |
| RmMan5B                       | man5B             | <i>Rhizomucor miehei</i> strain CAU432, zygomycete fungus                        | A0A075C6T6        | 7              | 51,321                                               | 4LYP, 4LYQ    | monomer              | n.a.                             | n.a.                                             | n.a.                                                                              | 1.93                                 | Yes                         | Zhou <i>et al.</i> 2014        | 10.1107/S1399004714019762            |  |
| LrMan5B                       | LRAMOS04528       | <i>Lichtheimia ramosa</i> , zygomycete fungus                                    | A0A077WZ93        | –              | 50,996                                               | n.a.          | n.a.                 | 1.38                             | 19.7                                             | 14.3                                                                              | –                                    | n.a.                        | Xie <i>et al.</i> 2019         | 10.1016/j.jbio.2019.04.007           |  |
| AcMan5                        | acman5            | <i>Lichtheimia (Absidia) corymbifera</i> strain D1, zygomycete fungus            | A0A141PG32        | –              | 49,797                                               | n.a.          | n.a.                 | n.a.                             | n.a.                                             | n.a.                                                                              | 2.65                                 | Yes                         | Li <i>et al.</i> 2015          | 10.1016/j.molcatb.2015.09.018        |  |
| <b>GH2 (Bacteria)</b>         |                   |                                                                                  |                   |                |                                                      |               |                      |                                  |                                                  |                                                                                   |                                      |                             |                                |                                      |  |
| BtMan2A                       | BT_0458           | <i>Bacteroides thetaiotaomicron</i> strain VPI-548, Bacteroidetes                | Q8AAK6            | –              | 99,506                                               | 2JE8          | homodimer            | 0.19                             | 128                                              | 667                                                                               | –                                    | No                          | Tailford <i>et al.</i> 2007    | 10.1074/jbc.M610964200               |  |
| TmMan2                        | TM_1624           | <i>Thermotoga maritima</i> strain MSB8, Thermotogae                              | Q9X1V9            | –              | 92,373                                               | n.a.          | monomer              | 0.49                             | 8.4                                              | 17.2                                                                              | –                                    | Yes                         | Zhang <i>et al.</i> 2009       | 10.1016/j.molcatb.2009.04.005        |  |
| TnMan2                        | man2              | <i>Thermotoga neapolitana</i> strain DSM 5068, Thermotogae                       | Q93M25            | –              | 92,197                                               | n.a.          | homodimer            | 3.1                              | 67.8                                             | 24.2                                                                              | –                                    | n.a.                        | Duffaud <i>et al.</i> 1997     | 10.1128/AEM.63.1.169-177.1997        |  |
| ManB                          | manB              | <i>Thermobifida (Thermomonospora) fusca</i> strain TM5, Actinobacteria           | Q8KLI9            | –              | 94,228                                               | n.a.          | n.a.                 | 0.18                             | 9.34                                             | 51.9                                                                              | –                                    | Yes                         | Beki <i>et al.</i> 2003        | 10.1128/aem.69.4.1944-1952.2003      |  |
| CjMan2A                       | man2              | <i>Cellulomonas fimi</i> strain ATCC 484, Actinobacteria                         | Q9XCV4            | –              | 93,696                                               | n.a.          | monomer              | 0.3                              | <sup>d</sup> 167                                 | <sup>d</sup> 500                                                                  | –                                    | n.a.                        | Stoll <i>et al.</i> 1999       | 10.1128/AEM.65.6.2598-2605.1999      |  |
| Man2S27                       | bma               | <i>Streptomyces sp. S27</i> , Actinobacteria                                     | D2DFB5            | –              | 92,580                                               | n.a.          | n.a.                 | 0.23                             | 305                                              | 1320                                                                              | –                                    | Yes                         | Shi <i>et al.</i> 2011         | 10.1016/j.enzymictec.2011.06.003     |  |
| NixH                          | XCC2891           | <i>Xanthomonas campestris pv. campestris</i> strain ATCC 3391, Proteobacteria    | Q8P6S4            | –              | 100,196                                              | n.a.          | n.a.                 | 7.4                              | 1552                                             | 209.8                                                                             | –                                    | n.a.                        | Dupoiron <i>et al.</i> 2015    | 10.1074/jbc.M114.624593              |  |
| DtMan                         | DICTH_1692        | <i>Dictyoglomus thermophilum</i> strain DSM 3960, Firmicutes                     | B5YAN4            | –              | 96,130                                               | 5N6U          | homodimer            | 0.47                             | 298                                              | 617                                                                               | –                                    | n.a.                        | Guillot <i>et al.</i> 2017     | 10.1016/j.biochi.2017.03.020         |  |
| –                             | –                 | <i>Paenibacillus polymyxa (Bacillus polymyxa)</i> strain A-8, Firmicutes         | U5N3E2            | –              | 96,836                                               | n.a.          | n.a.                 | n.a.                             | n.a.                                             | n.a.                                                                              | 38                                   | n.a.                        | Bai <i>et al.</i> 2014         | 10.1371/journal.pone.0111622         |  |
| –                             | –                 | <i>Paenibacillus polymyxa (Bacillus)</i> strain A-8, Firmicutes, recombinant     | U5N3E2            | –              | 96,836                                               | n.a.          | n.a.                 | n.a.                             | n.a.                                             | n.a.                                                                              | 0.7                                  | n.a.                        | Bai <i>et al.</i> 2014         | 10.1371/journal.pone.0111622         |  |
| <b>GH2 (Eukaryota)</b>        |                   |                                                                                  |                   |                |                                                      |               |                      |                                  |                                                  |                                                                                   |                                      |                             |                                |                                      |  |
| MndA                          | mndA              | <i>Aspergillus niger</i> strain ATCC 46890, ascomycete fungus                    | Q9UUZ3            | –              | 104,390                                              | n.a.          | homodimer            | 0.30                             | 67.5                                             | 225                                                                               | –                                    | Yes                         | Ademark <i>et al.</i> 1999     | 10.1016/s0168-1656(99)00172-8        |  |
| MndA                          | mndA              | <i>Aspergillus niger</i> strain ATCC 46890, ascomycete fungus                    | Q9UUZ3            | –              | 104,390                                              | n.a.          | homodimer            | 0.46                             | 67.5                                             | 217                                                                               | –                                    | Yes                         | Reddy <i>et al.</i> 2013       | 10.1016/j.febslet.2013.08.029        |  |
| MndB                          | mndB              | <i>Aspergillus (Emericella) nidulans</i> strain ATCC 38163, ascomycete fungus    | Q5B7W2            | –              | 96,367                                               | n.a.          | n.a.                 | 0.22                             | 1.32                                             | 6.0                                                                               | –                                    | n.a.                        | Reddy <i>et al.</i> 2013       | 10.1016/j.febslet.2013.08.029        |  |
| bMann9                        | man9              | <i>Thermothelomyces thermophilus</i> strain C1, ascomycete fungus                | I2C092            | –              | 97,352                                               | n.a.          | n.a.                 | 0.41                             | 15                                               | 37                                                                                | –                                    | n.a.                        | Dotsenko <i>et al.</i> 2012    | 10.1134/S0006297912110090            |  |
| TtMan2A                       | –                 | <i>Hypocrea jecorina (Trichoderma reesi)</i> strain Z12, ascomycete fungus       | n.a.              | –              | n.a.                                                 | n.a.          | homodimer, putative  | 0.12                             | <sup>d</sup> 5.2                                 | <sup>d</sup> 43                                                                   | –                                    | n.a.                        | Kulminkaya <i>et al.</i> 1999  | 10.1016/S0141-0229(99)00056-3        |  |
| TtMan2A                       | –                 | <i>Hypocrea lixii (Trichoderma harzianum)</i> strain IOC-3844, ascomycete fungus | A0A075B5H6        | –              | 105,388                                              | 4CVU          | monomer              | n.a.                             | n.a.                                             | n.a.                                                                              | 3.2                                  | Yes                         | Nascimento <i>et al.</i> 2014  | 10.1111/febs.12894                   |  |
| ManbA                         | Manba             | <i>Mus musculus</i> (lysosomal)                                                  | Q8K214            | –              | 100,831                                              | 6DDU          | monomer              | 1.42                             | 72.2                                             | 51                                                                                | –                                    | n.a.                        | Gytz <i>et al.</i> 2019        | 10.1111/febs.14731                   |  |
| –                             | manba             | <i>Capra hircus</i> (lysosomal), goat kidney                                     | Q95327            | –              | 101,386                                              | n.a.          | n.a.                 | 9                                | n.a.                                             | n.a.                                                                              | 1.08                                 | n.a.                        | Frei <i>et al.</i> 1982        | 10.1042/bj2490871                    |  |
| –                             | manba             | <i>Homo sapiens</i> (lysosomal), human serum                                     | n.a.              | –              | (90,000)                                             | n.a.          | n.a.                 | 2.7                              | n.a.                                             | n.a.                                                                              | n.a.                                 | n.a.                        | Bernard <i>et al.</i> 1986     | 10.1016/0020-711x(86)90255-7         |  |
| –                             | manba             | <i>Homo sapiens</i> (lysosomal), human urine                                     | n.a.              | –              | (100,000)                                            | n.a.          | n.a.                 | 2.4                              | n.a.                                             | n.a.                                                                              | n.a.                                 | n.a.                        | Bernard <i>et al.</i> 1986     | 10.1016/0020-711x(86)90255-7         |  |
| –                             | manba             | <i>Homo sapiens</i> (lysosomal), human placenta                                  | O00462            | –              | (75,000)                                             | n.a.          | n.a.                 | 2.2                              | n.a.                                             | n.a.                                                                              | n.a.                                 | n.a.                        | Noeske & Mersmann 1983         | 10.1515/bchm2.1983.364.2.1645        |  |
| –                             | manba             | <i>Homo sapiens</i> (lysosomal), human placenta                                  | O00462            | –              | 100,895                                              | n.a.          | n.a.                 | 2.5                              | n.a.                                             | n.a.                                                                              | 12.7                                 | n.a.                        | Samra & Athar 2008             | Acta Biochim. Pol. 55, 479-490, 2008 |  |
| AkMnsd                        | AkMnsd            | <i>Aplysia kurodai</i> (gut), Kuroda's sea hare                                  | H1AFK3            | –              | 105,059                                              | n.a.          | n.d.                 | 0.10                             | 6.2                                              | 62                                                                                | –                                    | n.a.                        | Zahura <i>et al.</i> 2012      | 10.1016/j.cbpb.2012.02.003           |  |



Table S1. Cont.

| Enzyme name                     | Gene name        | Organism name                                                                  | UniProt accession | CAZy subfamily | <sup>a</sup> Molecular weight (g mol <sup>-1</sup> ) | PDB accession | Oligomeric state | <sup>b</sup> K <sub>m</sub> (mM) | <sup>c</sup> k <sub>cat</sub> (s <sup>-1</sup> ) | <sup>d</sup> k <sub>cat</sub> /K <sub>m</sub> (s <sup>-1</sup> mM <sup>-1</sup> ) | Specific activity U mg <sup>-1</sup> | Transglycosylation activity | Reference               | Digital object identifier              |
|---------------------------------|------------------|--------------------------------------------------------------------------------|-------------------|----------------|------------------------------------------------------|---------------|------------------|----------------------------------|--------------------------------------------------|-----------------------------------------------------------------------------------|--------------------------------------|-----------------------------|-------------------------|----------------------------------------|
| <b>GH1 (Archaea)</b>            |                  |                                                                                |                   |                |                                                      |               |                  |                                  |                                                  |                                                                                   |                                      |                             |                         |                                        |
| BmnA                            | bmnA             | <i>Pyrococcus furiosus</i> strain DSM 3638                                     | Q51733            | –              | 59,069                                               | n.a.          | tetramer         | 0.79                             | <i>31</i>                                        | <i>39</i>                                                                         | –                                    | n.a.                        | Bauer et al. 1996       | 10.1074/jbc.271.39.23749               |
| PFTG                            | PF0356           | <i>Pyrococcus furiosus</i> strain DSM 3638                                     | Q8U3U9            | –              | 56,327                                               | n.a.          | tetramer         | 0.09                             | 0.30                                             | 3.0                                                                               | –                                    | Yes                         | Park et al. 2011        | 10.1016/j.nbt.2011.05.002              |
| BglB                            | PH0501           | <i>Pyrococcus horikoshii</i> strain OT3                                        | O58237            | –              | 56,458                                               | n.a.          | tetramer         | 0.44                             | 4.2                                              | 9.8                                                                               | –                                    | n.a.                        | Kaper et al. 2002       | 10.1021/bi011935a                      |
| TkβGly                          | –                | <i>Thermococcus kodakarensis</i> strain KOD1                                   | Q9YGB8            | –              | 56,266                                               | n.a.          | homodimer        | 1.1                              | 51                                               | 47                                                                                | –                                    | n.a.                        | Hwa et al. 2015         | 10.1016/j.enzymetec.2015.05.002        |
| <b>GH1 (Eukaryota, Plantae)</b> |                  |                                                                                |                   |                |                                                      |               |                  |                                  |                                                  |                                                                                   |                                      |                             |                         |                                        |
| HvBII                           | –                | <i>Hordeum vulgare subsp. vulgare</i> , barley                                 | B5A496            | –              | 57,425                                               | n.a.          | n.a.             | 0.25                             | 3.1                                              | 12.7                                                                              | –                                    | Yes                         | Kuntothom et al. 2010   | 10.1021/bi101112c                      |
| Os7BGlu26                       | OsI_27163        | <i>Hordeum vulgare subsp. indica</i> , barley                                  | A2YPH1            | –              | 58,498                                               | 4JHO          | monomer          | 0.48                             | 0.35                                             | 0.71                                                                              | –                                    | n.a.                        | Tankrathok et al. 2013  | 10.1107/S0907444913020568              |
| LeMsIde                         | –                | <i>Solanum lycopersicum (Lycopersicon esculentum)</i> , tomato                 | Q8VWL8            | –              | 59,288                                               | n.a.          | n.a.             | 0.55                             | <i>10</i>                                        | <i>18</i>                                                                         | –                                    | n.a.                        | Mo & Bewley 2002        | 10.1007/s00425-001-0725-x              |
| BGLU44                          | BGLU44           | <i>Arabidopsis thaliana</i> , thale cress                                      | Q9LV33            | –              | 58,984                                               | n.a.          | n.a.             | 0.43                             | <i>6</i>                                         | <i>14</i>                                                                         | –                                    | n.a.                        | Xu et al. 2004          | 10.1007/s11103-004-0790-1              |
| <b>GH113 (Bacteria)</b>         |                  |                                                                                |                   |                |                                                      |               |                  |                                  |                                                  |                                                                                   |                                      |                             |                         |                                        |
| RtGH113                         | ROSINTL182_05483 | <i>Roseburia intestinalis</i> strain L1-82                                     | –                 | –              | 36,057                                               | n.a.          | n.a.             | n.a.                             | n.a.                                             | n.a.                                                                              | n.a.                                 | n.a.                        | La Rosa et al. 2019     | 10.1038/s41467-019-08812-y             |
| <b>GH164 (Bacteria)</b>         |                  |                                                                                |                   |                |                                                      |               |                  |                                  |                                                  |                                                                                   |                                      |                             |                         |                                        |
| Bs164                           | HMPREF1071_03408 | <i>Bacteroides salyersiae</i> strain CL02T12C01                                | I9SUA3            | –              | 76,732                                               | 6T50, 6T75    | homotrimer       | 3.6                              | 40                                               | 11                                                                                | –                                    | n.a.                        | Armstrong & Davies 2020 | 10.1074/jbc.RA119.011591               |
| <b>Not classified in CAZy</b>   |                  |                                                                                |                   |                |                                                      |               |                  |                                  |                                                  |                                                                                   |                                      |                             |                         |                                        |
| –                               | –                | <i>Bacillus mannanilyticus</i> strain DSM 16130 (AM-001), bacteria, firmicutes | n.a.              | –              | (94,000)                                             | n.a.          | n.a.             | 1.3                              | n.a.                                             | n.a.                                                                              | 38.8                                 | Yes                         | Akino et al. 1988       | 10.1080/00021369.1988.10868864         |
| –                               | –                | <i>Tremella fuciformis</i> , basidiomycete fungus                              | n.a.              | –              | (140,000)                                            | n.a.          | n.a.             | 2.1                              | n.a.                                             | n.a.                                                                              | 0.21                                 | n.a.                        | Sone & Misaki 1978      | 10.1093/oxfordjournals.jbcchem.a132003 |
| –                               | –                | <i>Laetiporus (Polyporus) sulphureus</i> , basidiomycete fungus                | n.a.              | –              | (64,000)                                             | n.a.          | n.a.             | 1.6                              | n.a.                                             | n.a.                                                                              | 4.2                                  | n.a.                        | Wan et al. 1976         | 10.1016/s0021-9258(17)33308-2          |
| –                               | –                | <i>Athelia (Sclerotium) rolfsii</i> , basidiomycete fungus                     | –                 | –              | (57,500)                                             | n.a.          | n.a.             | n.a.                             | n.a.                                             | n.a.                                                                              | <i>41</i>                            | n.a.                        | Gübitz et al. 1996      | 10.1016/S0960-8524(96)00093-4          |
| GM-1 (isoenzyme)                | –                | <i>Phlebia radiata</i> strain ATCC 64658, basidiomycete fungus                 | n.a.              | –              | (104,600)                                            | n.a.          | n.a.             | 0.3                              | <i>74</i>                                        | <i>247</i>                                                                        | –                                    | n.a.                        | Prendecka et al. 2007   | Pol. J. Microbiol. 56, 139-147, 2007   |
| GM-2 (isoenzyme)                | –                | <i>Phlebia radiata</i> strain ATCC 64658, basidiomycete fungus                 | n.a.              | –              | (89,500)                                             | n.a.          | n.a.             | 1.8                              | <i>72</i>                                        | <i>40</i>                                                                         | –                                    | n.a.                        | Prendecka et al. 2007   | Pol. J. Microbiol. 56, 139-147, 2007   |
| –                               | –                | <i>Thermoascus aurantiacus</i> Miehe, ascomycete fungus                        | n.a.              | –              | (99,900)                                             | n.a.          | monomer          | 1.1                              | 6.1                                              | <i>5.5</i>                                                                        | –                                    | Yes                         | Gomes et al. 2007       | 10.1016/j.enzymetec.2006.08.011        |
| –                               | –                | <i>Helix pomatia</i> , Roman snail                                             | n.a.              | –              | (94,000)                                             | n.a.          | n.a.             | 1.43                             | <i>159</i>                                       | <i>111</i>                                                                        | –                                    | n.a.                        | McCleary 1983           | 10.1016/0008-6215(83)88314-1           |
| –                               | –                | <i>Helix aspersa</i> Müller ( <i>Cornu aspersum</i> ), brown garden snail      | n.a.              | –              | (77,800)                                             | n.a.          | monomer          | 0.77                             | <i>64</i>                                        | <i>83</i>                                                                         | –                                    | n.a.                        | Charrier & Rouland 2001 | 10.1002/jez.1042                       |
| –                               | –                | <i>Achatina fulica</i> , giant African snail                                   | n.a.              | –              | n.a.                                                 | n.a.          | n.a.             | 6.5                              | n.a.                                             | n.a.                                                                              | 6.67                                 | n.a.                        | Sugahara et al. 1972    | 10.1016/0005-2744(72)90344-0           |
| –                               | –                | <i>Turbo cornutus</i> , horned turban sea snail                                | n.a.              | –              | n.a.                                                 | n.a.          | n.a.             | 7.1                              | n.a.                                             | n.a.                                                                              | 3.8                                  | n.a.                        | Muramatsu & Egami 1967  | 10.1093/oxfordjournals.jbcchem.a128726 |
| –                               | –                | <i>Aplysia fasciata</i> , mottled sea hare                                     | n.a.              | –              | (130,000)                                            | n.a.          | homodimer        | 2.4                              | <i>192</i>                                       | <i>80</i>                                                                         | –                                    | Yes                         | Andreotti et al. 2005   | 10.1016/j.jbiotec.2005.06.003          |
| –                               | –                | <i>Hordeum vulgare</i> , malted barley                                         | n.a.              | –              | (88,000)                                             | n.a.          | n.a.             | 0.3                              | n.a.                                             | n.a.                                                                              | 0.6                                  | n.a.                        | Houston et al. 1974     | 10.1016/0005-2744(74)90052-7           |
| –                               | –                | <i>Lactuca sativa L. cv. Grand Rapids</i> , garden lettuce                     | n.a.              | –              | n.a.                                                 | n.a.          | n.a.             | 0.3                              | n.a.                                             | n.a.                                                                              | n.a.                                 | n.a.                        | Ouellette & Bewley 1986 | 10.1007/BF00392128                     |
| –                               | –                | <i>Cyamopsis tetragonolobus</i> (guar seeds)                                   | –                 | –              | (59,000)                                             | n.a.          | n.a.             | 0.5                              | <i>15</i>                                        | <i>30</i>                                                                         | 15.6                                 | n.a.                        | McCleary 1982           | Meth. Enzymol. 160, 589-595, 1982      |
| –                               | –                | <i>Gallus gallus</i> , hen oviduct                                             | n.a.              | –              | (100,000)                                            | n.a.          | n.a.             | 2.9                              | n.a.                                             | n.a.                                                                              | n.a.                                 | n.a.                        | Sukeno et al. 1972      | 10.1021/bi00758a026                    |

<sup>a</sup>Theoretical molecular weight of a protein monomer derived from the amino-acid sequence. Numbers in soft brackets refer to the experimentally determined molecular weight by SDS-PAGE and is given when the sequence is not available.

<sup>b</sup>Italicized values were derived estimates calculated from the data reported in the original reference

<sup>c</sup>n.a., information not available

<sup>d</sup>Activity confirmed but substrate saturation not reached, which prevented deduction of the catalytic constants

<sup>e</sup>Substrate inhibition was observed and the values are estimates.

<sup>f</sup>The derived values assume that the  $k_{cat}$  value is  $2.95 \cdot 10^3 \mu\text{mol} \mu\text{g}^{-1} \text{min}^{-1}$ , and not  $2.95 \cdot 10^3 \mu\text{mol} \text{min} \mu\text{g}^{-1}$  as given in the original reference

**Table S2. Data collection, phasing and refinement statistics**

| <b>Data collection<sup>a</sup></b>                                                     |                                    |
|----------------------------------------------------------------------------------------|------------------------------------|
| Synchrotron, beamline                                                                  | Diamond Light Source, I03          |
| Wavelength (Å)                                                                         | 0.826561                           |
| Space group / mol per a.s.u.                                                           | $P2_12_12_1$ / 3 (one homotrimer)  |
| Cell dimensions: <i>a</i> , <i>b</i> , <i>c</i> (Å), $\alpha$ , $\beta$ , $\gamma$ (°) | 102.14, 162.45, 168.18, 90, 90, 90 |
| Resolution (Å), nominal                                                                | 49.15–2.20 (2.30–2.20)             |
| Unique reflections                                                                     | 141664 (17459)                     |
| $R_{\text{sym}}$                                                                       | 0.107 (1.865)                      |
| $I / \sigma I$                                                                         | 11.9 (1.3)                         |
| Completeness (%)                                                                       | 99.7 (99.4)                        |
| Redundancy                                                                             | 13.3 (12.6)                        |
| CC(1/2) <sup>b</sup>                                                                   | 99.9 (76.8)                        |
| Wilson <i>B</i> factor (Å <sup>2</sup> )                                               | 45.16                              |
| <b>Refinement</b>                                                                      |                                    |
| Resolution (Å)                                                                         | 48.87–2.20 (2.28–2.20)             |
| Completeness                                                                           | 99.64 (99.39)                      |
| No. reflections work                                                                   | 141605 (13961)                     |
| No. reflections free                                                                   | 2012 (197)                         |
| $R_{\text{work}}$                                                                      | 0.203 (0.385)                      |
| $R_{\text{free}}$                                                                      | 0.227 (0.401)                      |
| N <sup>o</sup> . non-hydrogen atoms: all, protein, water                               | 13299, 13134, 165                  |
| N <sup>o</sup> . protein residues, all chains                                          | 1662                               |
| Missing residues chain A, B, C                                                         | 41, 38, 41                         |
| Mean <i>B</i> factors protein, water (Å <sup>2</sup> )                                 | 56.9, 52.0                         |
| R.m.s deviation bond lengths (Å), bond angles (°)                                      | 0.008, 0.89                        |
| Ramachandran, MolProbity: allowed, favored, outliers (%)                               | 99.94, 97.14, 0.06                 |
| PDB ID                                                                                 | 7BOB                               |

<sup>a</sup> Statistics for outer-shell reflections are given in parentheses.

<sup>b</sup> Percentage of correlation between intensities from random half-datasets as given by XSCALE. Values given represent correlations significant at the 0.1% level.<sup>48</sup>
